# Supplementary material for: Neurodevelopmental disorders associated variants in ADAT3 disrupt the activity of the ADAT2/ADAT3 tRNA deaminase complex and impair neuronal migration
Source: bioRxiv or medRxiv preprint supplement (doi:10.1101/2024.03.01.24303485), 2024-11-18

Supplementary Figure 1

A

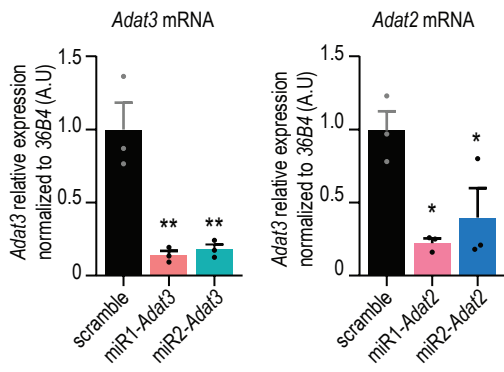

B

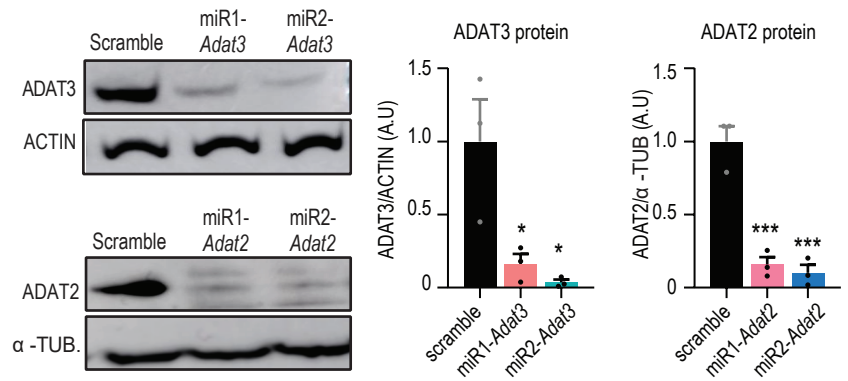

C

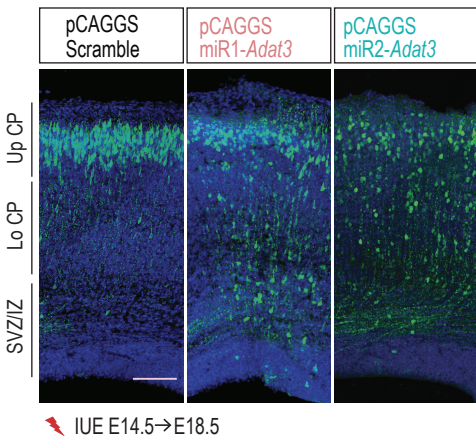

D

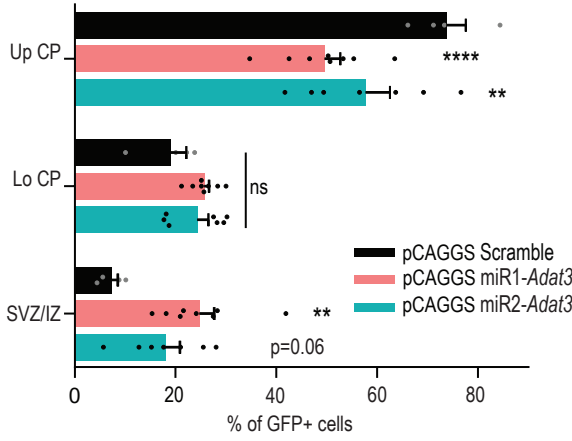

E

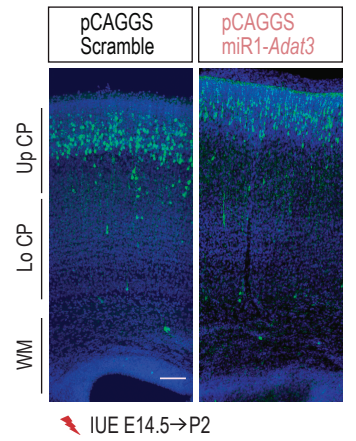

F

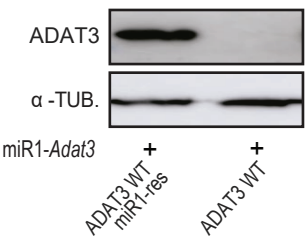

G

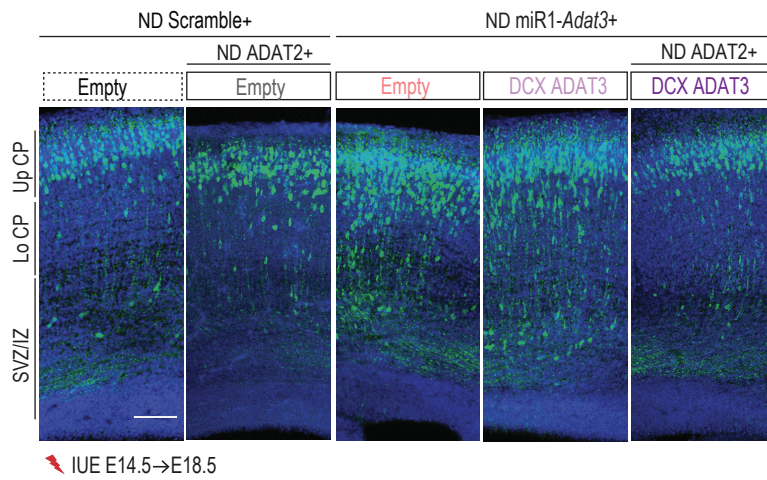

H

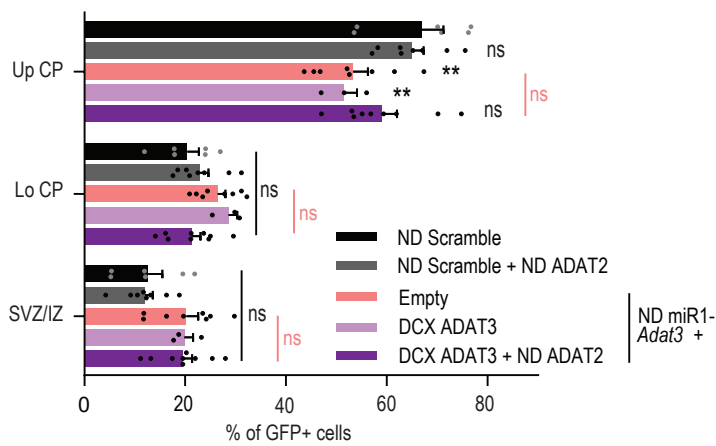

I

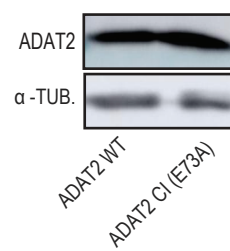

Supplementary Figure 2

A

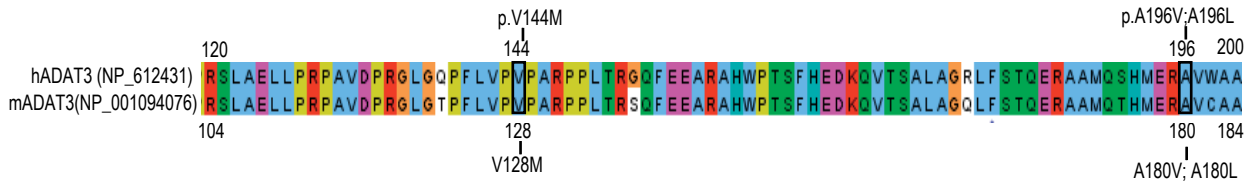

B

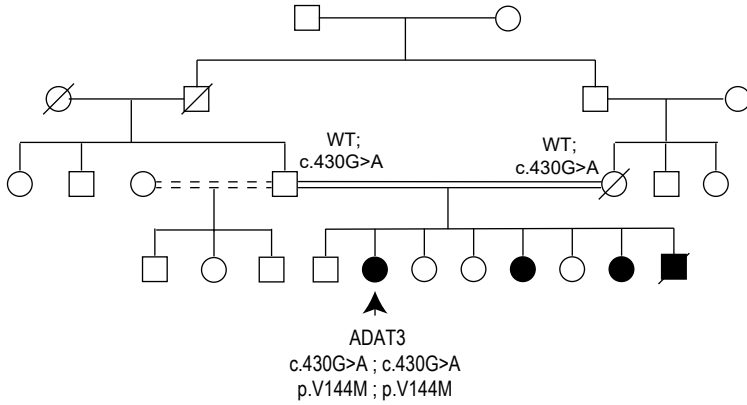

C

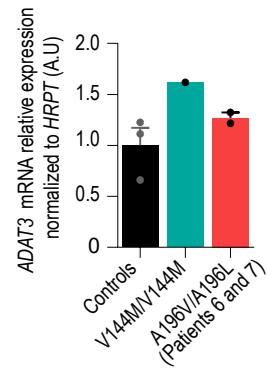

D

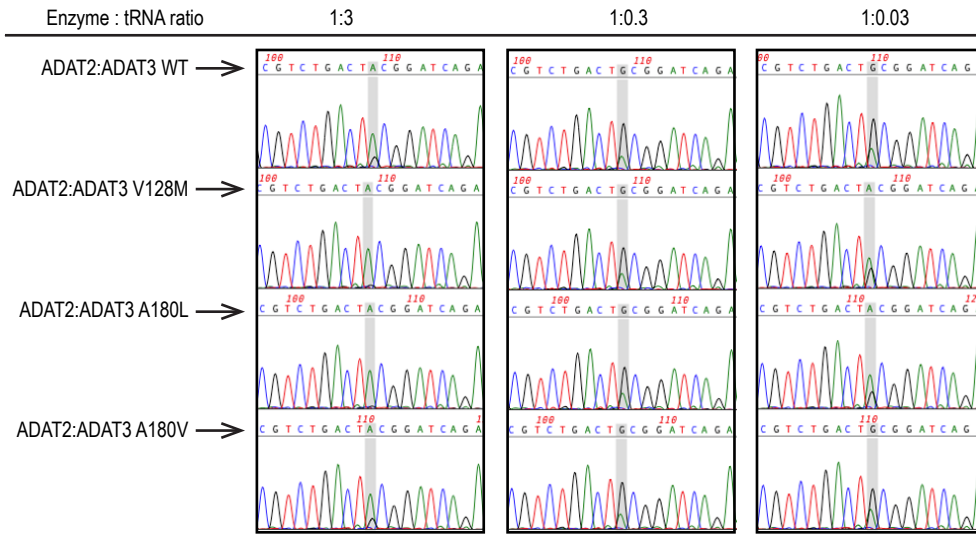



# Supplementary Figure 4

A

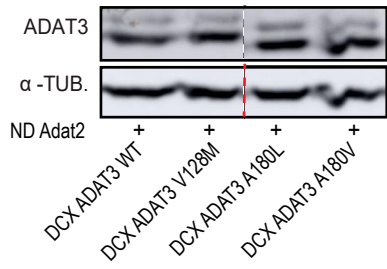

B

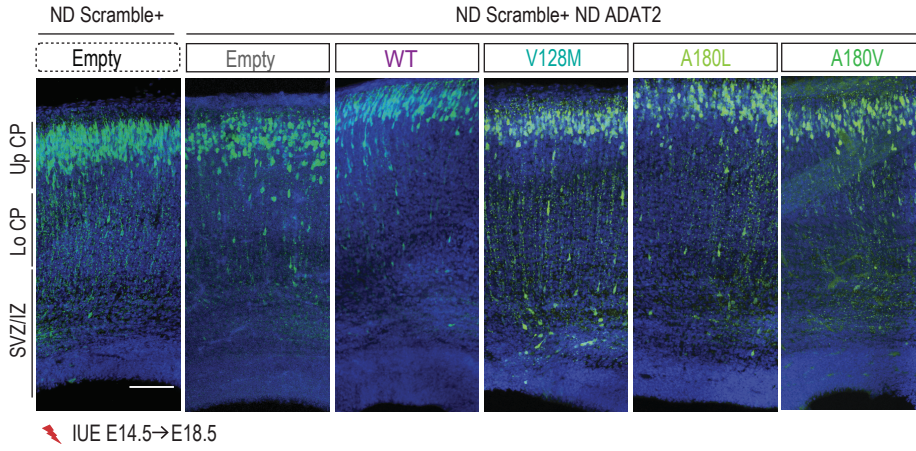

C

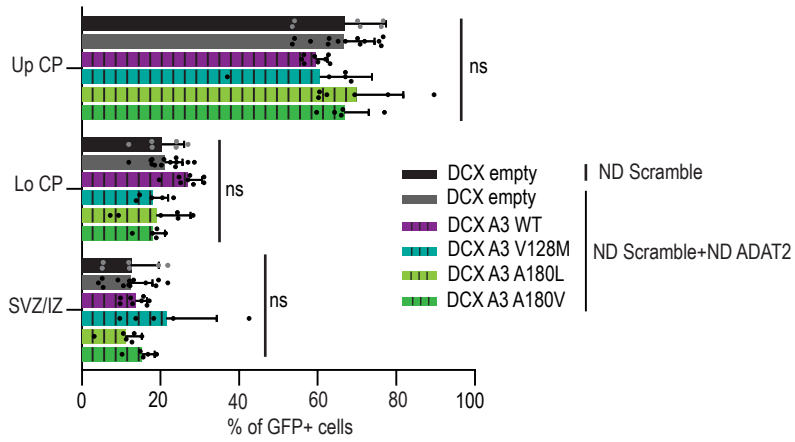

Supplement: Supplementary file [file media-2.pdf]
