# Supplementary material for: Neurodevelopmental disorders associated variants in ADAT3 disrupt the activity of the ADAT2/ADAT3 tRNA deaminase complex and impair neuronal migration
Source: bioRxiv or medRxiv preprint supplement (doi:10.1101/2024.03.01.24303485), 2024-11-18
Supplement: Supplementary file [file media-1.pdf]

## Supplementary information

### Neurodevelopmental disorders associated variants in ADAT3 disrupt the activity of the ADAT2/ADAT3 tRNA deaminase complex and impair neuronal migration.

*Del-Pozo-Rodriguez et al.*

Content:

- **Supplementary Figure 1:** Ubiquitous knockdown of *Adat3* and *Wdr4* recapitulates their neuron specific knockdown.
- **Supplementary Figure 2:** Effect of the V144M and A106V/L ADAT3 mutants at the transcript and activity levels.
- **Supplementary Figure 3:** Deamination and abundance of ADAT2/ADAT3 target tRNAs in patient cells.
- **Supplementary Figure 4:** Overexpression of WT and *Adat3* variants does not impair neuronal migration

**Supplementary Figure 1. Ubiquitous knockdown of *Adat3* recapitulates the neuron specific knockdown.**

(A-B) Knockdown efficiency of *Adat3* and *Adat2* miRNAs assessed by (A) RT-qPCR and (B) Western blot analysis. Data (n=3 for each condition) are represented as means  $\pm$  S.E.M. Significance was calculated by one-way ANOVA (Bonferroni's multiple comparisons test), \*P < 0.05; \*\*P < 0.005; \*\*\*P < 0.0005. (C) Coronal sections of E18.5 mouse cortices electroporated at E14.5 with pCAGGS scramble or two distinct pCAGGS-*Adat3* miRNAs (miR1 and miR2) together with ND-GFP. GFP-positive electroporated cells are depicted in green. Nuclei are stained with DAPI. Scale bars, 100  $\mu$ m. (D) Percentage (means  $\pm$  S.E.M.) of the positive electroporated cells (GFP +, green) in upper (Up CP) and lower (Lo CP) cortical plate, intermediate (IZ) and subventricular zone (SVZ) showing the faulty migration upon ubiquitous silencing of *Adat3*. Data were analyzed by two-way ANOVA (Bonferroni's multiple comparisons test). Number of embryos analyzed: pCAGGS Scramble, n=4; pCAGGS miR1-*Adat3*, n=8; pCAGGS miR2-*Adat3*, n=7. ns non-significant; \*\*P < 0.005; \*\*\*\*P < 0.0001. (E) Coronal sections of P2 mouse cortices electroporated at E14.5 with scramble or miR1-*Adat3* under the pCAGGS ubiquitous promoter together with ND-GFP. GFP-positive electroporated cells are depicted in green. Nuclei are stained with DAPI. *Adat3* deficient neurons reach their final position by P2 indicating a transient rather a permanent arrest of migration upon loss of *Adat3*. Scale bars, 100  $\mu$ m. (F) Western blot analysis to confirm the insensitivity of ADAT3 WT miR1 resistant (ADAT3 WT miR1-res) construct against knockdown by miR1-*Adat3*. (G) Coronal sections of E18.5 mouse cortices electroporated at E14.5 with the indicated constructs. GFP-positive electroporated cells are depicted in green. Nuclei are stained with DAPI. Scale bars, 100  $\mu$ m. (H) Percentage (means  $\pm$  S.E.M.) of electroporated cells in upper (Up CP) and lower (Lo CP) cortical plate, intermediate (IZ) and subventricular zone (SVZ) showing that expression of ND-ADAT2 together with scramble does not lead to any phenotype and migration defects upon loss of *Adat3* are rescued only when ND-ADAT2 is co-expressed together with DCX-ADAT3. Data were analyzed by two-way ANOVA (Tukey's multiple comparisons test). Number of embryos analyzed: ND Scramble, n =6; ND Scramble + ND ADAT2, n=7; ND miR1-*Adat3* + Empty, n=8; ND miR1-*Adat3* + DCX ADAT3, n=3; ND miR1-*Adat3* + DCX ADAT3 + ND ADAT2, n=8. ns non-significant; \*\*P < 0.005.

**Supplementary Figure 2. Effect of the V144M and A106V/L ADAT3 mutants at the transcript and activity levels.**

(A) Alignment of ADAT3 protein across human and mouse showing the conservation of the p.V144 (corresponding to p.V128 in mouse) and p.A196 (corresponding to p.A180 in mouse) residues. (B) Pedigrees of previously published patient <sup>1</sup> with the p.V144M/p.V144M ADAT3 variant from whom the LCLs were derived to analyze the effect of p.V144M/p.V144M variant. (C) RT-qPCR analyses showing unchanged *ADAT3* mRNA levels in patients with p.V144M/p.V144M and p.A196V/p.A196L variants (Patients 6 and 7). Each dot represents one cell line. (D) Sequencing chromatogram analysis of RT-PCR products amplified from *in vitro* transcribed tRNA-Arg-ACG after incubation with different amounts of purified recombinant WT or mutant ADAT2/ADAT3 complexes. The wobble adenosine/inosine position is highlighted in gray. Inosine is read as G.

**Supplementary Figure 3. Deamination and abundance of ADAT2/ADAT3 target tRNAs in patient cells.**

**(A-B)** Heatmap showing I<sub>34</sub> proportion at the anticodon level in ADAT2/ADAT3 target tRNAs in LCLs derived from **(A)** p.V144M/p.V144M and **(B)** p.A196V/p.A196L patients compared to control. (Controls, n=2; V144M/V144M, n=2; A196V/A196L (Patient 6) n=3; A196V/A196L (Patient 7) n=3). **(C)** Alignment statistics for mim-tRNAseq reads. Bars are mean values per cell line. (Controls, n=2; V144M/V144M, n=2; A196V/A196L (Patient 6) n=3; A196V/A196L (Patient 7) n=3). **(D)** Bar plot of cytosolic and mitochondrial tRNA read fractions per cell line. Bars: mean (Controls, n=2; V144M/V144M, n=2; A196V/A196L (Patient 6) n=3; A196V/A196L (Patient 7) n=3), percentages: mean mitochondrial fraction. **(E-F)** Box plots of **(E)** full-length read fraction and **(F)** full 3'-CCA end fraction per tRNA transcript (Controls, n=2; V144M/V144M, n=2; A196V/A196L (Patient 6) n=3; A196V/A196L (Patient 7) n=3); center line and label: median; box limits: upper and lower quartiles; whiskers: 1.5×interquartile range). **(G-I)** Graphs showing DESeq2 log<sub>10</sub> proportional counts of each tRNA isodecoder in LCLs derived from **(G)** p.V144M/p.V144M (n=2), **(H)** p.A196V/p.A196L (Patient 6, n=3) and **(I)** p.A196V/p.A196L (Patient 7, n=3) compared to control (Controls, n=2). Triangle and circle show ADAT targets and non-target tRNAs respectively. Green, orange and grey represent upregulated, downregulated and unchanged tRNAs respectively based on DESeq2 padj<0.05. **(J)** Principal component analysis (PCA) of count data for tRNA transcripts from DESeq2 for each cell line. PC<sub>i</sub> axis represents the principal component i and the number indicates the percentage of explained variance associated with this axis. (Controls, n=2; V144M/V144M, n=2; A196V/A196L (Patient 6) n=3; A196V/A196L (Patient 7) n=3) **(K)** Heatmap showing log<sub>2</sub> DESeq2 fold change summed by anticodon. White boxes show non-significant ones.

**Supplementary Figure 4. Overexpression of WT and Adat3 variants does not impair neuronal migration.**

(A) Western blot analysis of showing similar expression of ADAT3 WT, V128M, A180L and A180V constructs. Red dashed line shows the position of membrane cut to remove constructs that were not used in this study. (B) Coronal sections of E18.5 mouse cortices electroporated at E14.5 with NeuroD (ND) scramble either alone or together with ND ADAT2 in combination with DCX Empty or DCX ADAT3 WT or DCX ADAT3 variants. GFP-positive electroporated cells are depicted in green. Nuclei are stained with DAPI. Scale bars, 100  $\mu$ m. (C) Analysis of percentage (means  $\pm$  S.E.M.) of electroporated cells in upper (Up CP) and lower (Lo CP) cortical plate, intermediate (IZ) and subventricular zone (SVZ) showing no effect on migration upon overexpression of any of the constructs. Data were analyzed by two-way ANOVA (Tukey's multiple comparison test). Number of embryos analyzed: ND Scramble, n =6; ND Scramble + ND ADAT2, n=13; ND Scramble + ND ADAT2+DCX ADAT3 WT, n= 8; ND Scramble + ND ADAT2+DCX ADAT3 V128M, n= 5; ND Scramble + ND ADAT2+DCX ADAT3 A180L, n= 6; ND Scramble + ND ADAT2 + DCX ADAT3 A180V, n=5. ns non-significant

1. Ramos J, *et al.* Formation of tRNA Wobble Inosine in Humans Is Disrupted by a Millennia-Old Mutation Causing Intellectual Disability. *Mol Cell Biol* **39**, (2019).
